# Supplementary material for: Host and Seasonal Effects on the Abundance of Bean Leaf Beetles (Ootheca spp.) (Coleoptera: Chrysomelidae) in Northern Uganda
Source: Insects. 2022 Sep 18;13(9):848. doi: 10.3390/insects13090848 (PMC9503690; doi:10.3390/insects13090848)
Supplement: Supplementary file 1 [file insects-13-00848-s001.zip › insects-1835633-supplementary.pdf]

Table S1: Delineated growth stages for common bean, cowpea and soybean

| Growth stage                   | Description                                                                                                                                                                                                                                                                                              |
|--------------------------------|----------------------------------------------------------------------------------------------------------------------------------------------------------------------------------------------------------------------------------------------------------------------------------------------------------|
| 1. Seedling stage              | <ul style="list-style-type: none"> <li>VC – two cotyledons and primary leaves visible at nodes 1 and 2, respectively</li> <li>V1 – first tri-foliate leaf unfolded at node 3</li> <li>V2 – second tri-foliate leaf unfolded at node 4</li> <li>V3 – third tri-foliate leaf unfolded at node 5</li> </ul> |
| 2. Vegetative with branching   | <ul style="list-style-type: none"> <li>V4 – fourth tri-foliate leaf unfolded at node 6 + branching</li> <li>Vn – more than four tri-foliate leaves, without open flower</li> </ul>                                                                                                                       |
| 3. Flowering and pod formation | <ul style="list-style-type: none"> <li>R1 – at least one open flower on the plant</li> <li>R2 – Fifty percent open flowers</li> <li>R3 – One pod at maximum length</li> <li>R4 – fifty percent of pods at maximum length</li> <li>R5 – one pod with fully developed seeds</li> </ul>                     |
| 4. Pod maturation              | <ul style="list-style-type: none"> <li>R6 – fifty percent of pods with fully developed seeds</li> <li>R7 – one pod at mature colour (physiological maturity)</li> <li>RH – eighty percent of pods at mature colour (harvest maturity)</li> </ul>                                                         |

Table S2: Degrees of freedom, F statistics (v.r.), and p-value (F pr.) from repeated measures analysis of variance for number of *Oothea* spp., leaf damage, and percent plants with beetles

| Source of variation                   | d.f.(m.v.) | Transformed number of BLBs per plot |       | Leaf damage |       | Transformed percent plants with BLBs |       |
|---------------------------------------|------------|-------------------------------------|-------|-------------|-------|--------------------------------------|-------|
|                                       |            | v.r.                                | F pr. | v.r.        | F pr. | v.r.                                 | F pr. |
| Replication stratum                   | 3          | 0.52                                |       | 0.87        |       | 2.02                                 |       |
| Replication x Subject stratum         |            |                                     |       |             |       |                                      |       |
| Host plant                            | 2          | 75.14                               | <.001 | 254.78      | <.001 | 85.10                                | <.001 |
| Season                                | 2          | 816.83                              | <.001 | 194.26      | <.001 | 1224.69                              | <.001 |
| District                              | 1          | 546.62                              | <.001 | 194.21      | <.001 | 725.31                               | <.001 |
| Host plant x Season                   | 4          | 53.54                               | <.001 | 10.60       | <.001 | 28.22                                | <.001 |
| Host plant x District                 | 2          | 37.66                               | <.001 | 51.27       | <.001 | 22.26                                | <.001 |
| Season x District                     | 2          | 470.36                              | <.001 | 54.71       | <.001 | 448.66                               | <.001 |
| Host plant x Season x District        | 4          | 26.02                               | <.001 | 6.37        | <.001 | 6.95                                 | <.001 |
| Residual                              | 51         | 1.17                                |       | 2.22        |       | 0.62                                 |       |
| Replication x Subject x time stratum  |            |                                     |       |             |       |                                      |       |
| d.f. correction factor 0.4888         |            |                                     |       |             |       |                                      |       |
| Time                                  | 8          | 20.53                               | <.001 | 111.01      | <.001 | 13.98                                | <.001 |
| Time x Host plant                     | 16         | 3.24                                | 0.002 | 9.05        | <.001 | 1.35                                 | 0.200 |
| Time x Season                         | 16         | 19.55                               | <.001 | 32.35       | <.001 | 13.44                                | <.001 |
| Time x District                       | 8          | 16.35                               | <.001 | 43.18       | <.001 | 10.99                                | <.001 |
| Time x Host plant x Season            | 32         | 2.79                                | <.001 | 3.14        | <.001 | 0.94                                 | 0.536 |
| Time x Host plant x District          | 16         | 3.64                                | <.001 | 7.77        | <.001 | 2.21                                 | 0.016 |
| Time x Season x District              | 16         | 14.44                               | <.001 | 31.20       | <.001 | 7.78                                 | <.001 |
| Time x Host plant x Season x District | 32         | 3.15                                | <.001 | 6.41        | <.001 | 1.62                                 | 0.046 |
| Residual                              | 430(2)     |                                     |       |             |       |                                      |       |
| Total                                 | 645(2)     |                                     |       |             |       |                                      |       |

Table S3: Degrees of freedom, F statistic (v.r.), and p-value (F pr.) repeated measures analysis of variance for abundance of below-ground life stages of *Oothea* spp.

| Source of variation                                           | d.f. | Transformed<br>number of larvae per<br>plot |       | Transformed<br>number of pupae<br>per plot |       | Transformed number of<br>below-ground adults per<br>plot |       |
|---------------------------------------------------------------|------|---------------------------------------------|-------|--------------------------------------------|-------|----------------------------------------------------------|-------|
|                                                               |      | v.r.                                        | F pr. | v.r.                                       | F pr. | v.r.                                                     | F pr. |
| Rep stratum                                                   | 3    | 0.60                                        |       | 1.09                                       |       | 3.55                                                     |       |
| Rep x Subject stratum                                         |      |                                             |       |                                            |       |                                                          |       |
| Host plant                                                    | 2    | 23.23                                       | <.001 | 13.24                                      | <.001 | 17.88                                                    | <.001 |
| Season                                                        | 2    | 105.58                                      | <.001 | 24.36                                      | <.001 | 35.18                                                    | <.001 |
| District                                                      | 1    | 18.86                                       | <.001 | 0.02                                       | 0.887 | 13.72                                                    | <.001 |
| Host plant x Season                                           | 4    | 14.42                                       | <.001 | 7.81                                       | <.001 | 6.35                                                     | <.001 |
| Host plant x District                                         | 2    | 1.23                                        | 0.302 | 0.07                                       | 0.934 | 1.07                                                     | 0.351 |
| Season x District                                             | 2    | 31.95                                       | <.001 | 1.77                                       | 0.181 | 10.24                                                    | <.001 |
| Host plant x Season x District                                | 4    | 3.93                                        | 0.007 | 0.77                                       | 0.553 | 1.83                                                     | 0.137 |
| Residual                                                      | 51   | 0.87                                        |       | 2.64                                       |       | 1.46                                                     |       |
| Rep x Subject x Time stratum<br>d.f. correction factor 0.3920 |      |                                             |       |                                            |       |                                                          |       |
| Time                                                          | 8    | 17.20                                       | <.001 | 2.18                                       | 0.072 | 5.52                                                     | <.001 |
| Time x Host plant                                             | 16   | 6.51                                        | <.001 | 0.72                                       | 0.676 | 2.24                                                     | 0.021 |
| Time x Season                                                 | 16   | 19.71                                       | <.001 | 2.39                                       | 0.018 | 14.62                                                    | <.001 |
| Time x District                                               | 8    | 4.40                                        | 0.005 | 0.89                                       | 0.472 | 2.80                                                     | 0.022 |
| Time x Host plant x Season                                    | 32   | 6.53                                        | <.001 | 1.11                                       | 0.351 | 3.48                                                     | <.001 |
| Time x Host plant x District                                  | 16   | 2.75                                        | 0.013 | 0.64                                       | 0.740 | 0.93                                                     | 0.498 |
| Time x Season x District                                      | 16   | 3.25                                        | 0.004 | 0.48                                       | 0.865 | 3.65                                                     | <.001 |
| Time x Treatment x Season x District                          | 32   | 2.38                                        | 0.006 | 0.46                                       | 0.963 | 0.87                                                     | 0.617 |
| Residual                                                      | 432  |                                             |       |                                            |       |                                                          |       |
| Total                                                         | 647  |                                             |       |                                            |       |                                                          |       |

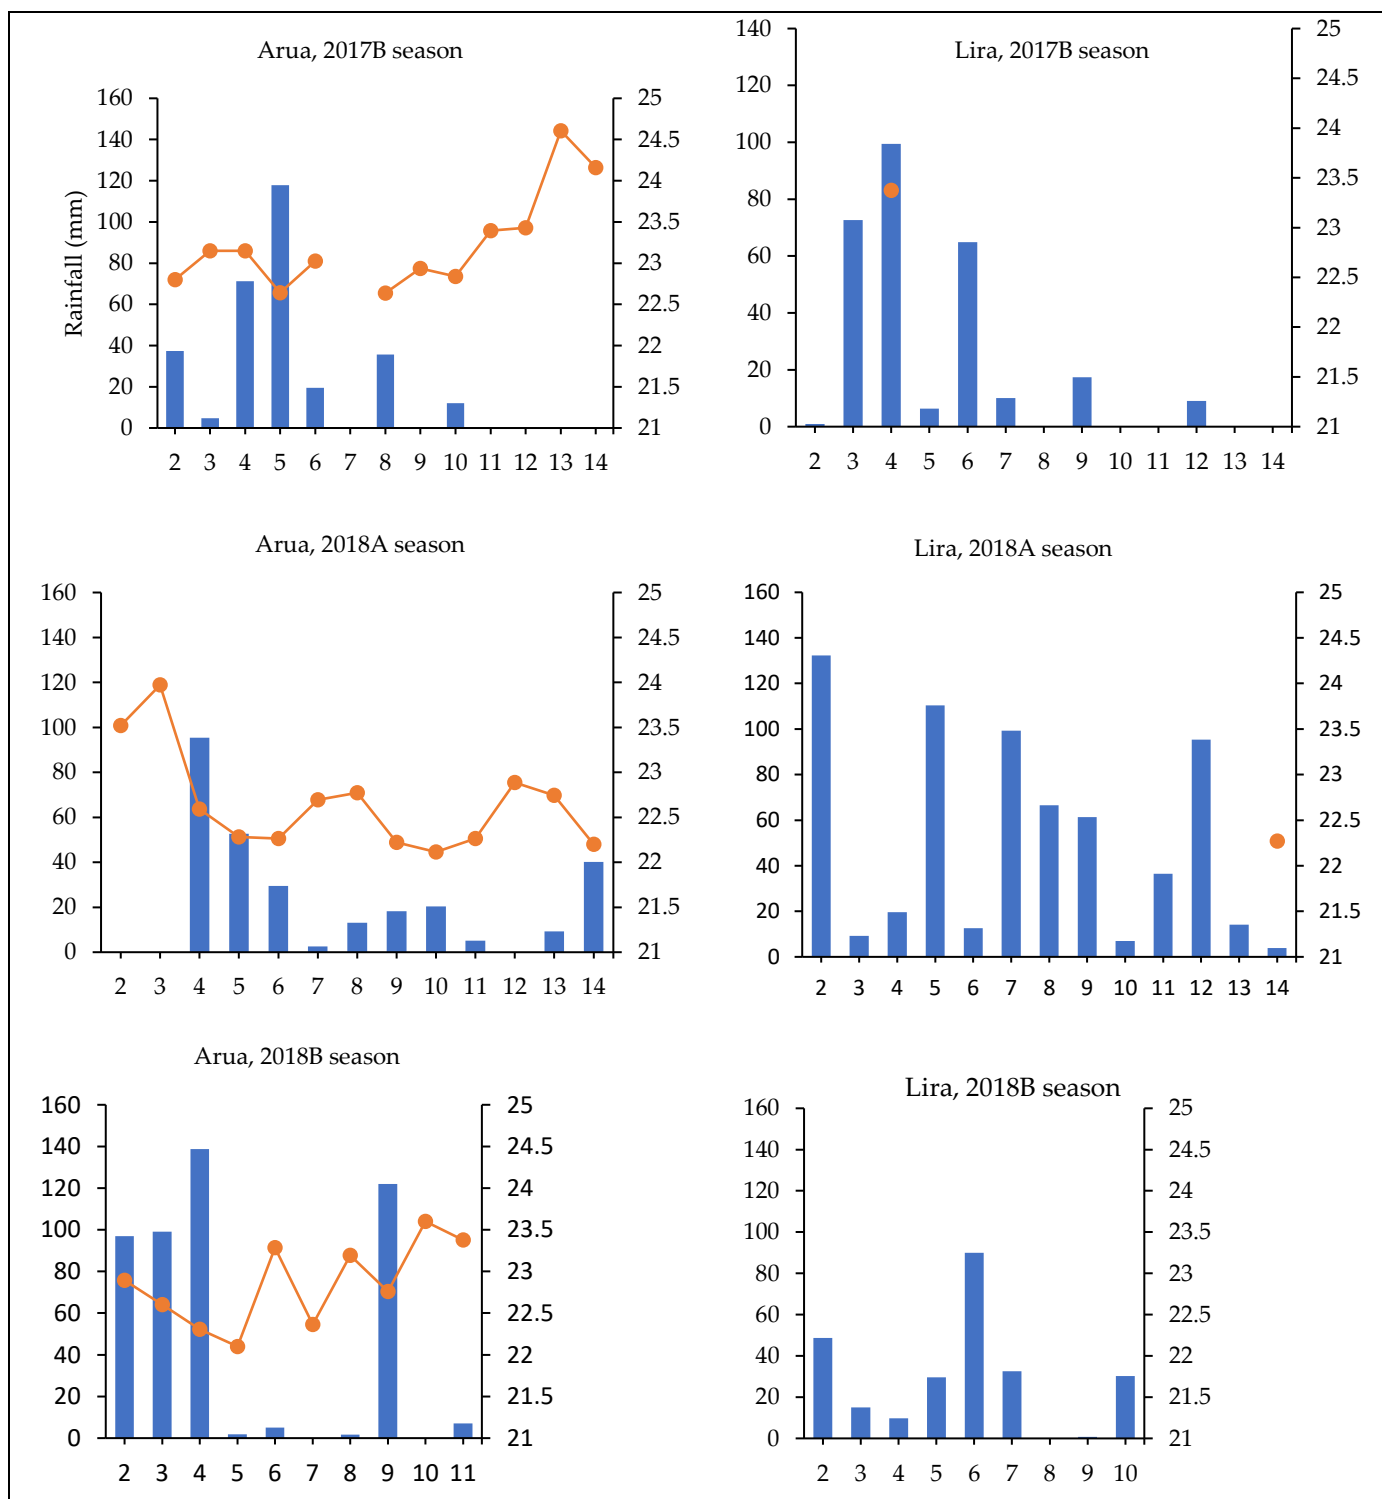

Figure S1: Rainfall and temperature distribution against weeks after planting in Arua and Lira during 2017B, 2018A and 2018B rain season. Temperature data is missing for many points in Lira district due to breakdown of devices. Metrological data source is Uganda Metrological Authority (UMA)
